# Supplementary material
Source: PubMed Central journal article supplement (PMC6587584)
Supplement: NIHMS1523731-supplement-Supplement1.pdf [file NIHMS1523731-supplement-Supplement1.pdf]

## Supplementary Appendix

This appendix has been provided by the authors to give readers additional information about their work.

Supplement to: Ridker PM, Everett BM, Pradhan A, et al. Low-dose methotrexate for the prevention of atherosclerotic events. *N Engl J Med* 2019;380:752-62. DOI: 10.1056/NEJMoa1809798

## SUPPLEMENTARY APPENDIX

### Low-Dose Methotrexate for the Prevention of Atherosclerotic Events

Paul M Ridker, MD; Brendan M Everett, MD; Aruna Pradhan, MD; Jean MacFadyen, BA; Daniel Solomon, MD; Elaine Zaharris, BA; Virak Mam, BS; Ahmed Hasan, MD; Yves Rosenberg, MD; Erin Iturriaga, MSN, Milan Gupta, MD; Subodh Verma, MD; Michelle Tsigoulis, BS; Michael Clearfield, DO; Peter Libby, MD; Samuel Z Goldhaber, MD; Roger Seagle, MD; Cyril Ofori, MD; Mohammad Saklayen, MD; Samuel Butman, MD; Narendra Singh, MD; Michel Le May, MD; Olivier Bertrand, MD; James Johnston, MD; Nina Paynter, PhD, and Robert J Glynn ScD for the Cardiovascular Inflammation Reduction Trial (CIRT) Investigators.

### Data from September 19, 2018 Closure

#### Table of Contents

|           |                                                                                                                |           |
|-----------|----------------------------------------------------------------------------------------------------------------|-----------|
| <b>A.</b> | <b>Section A. Lists of Committees and Investigators.....</b>                                                   | <b>2</b>  |
| <b>B.</b> | <b>Section B. Trial Inclusion and Exclusion Criteria .....</b>                                                 | <b>8</b>  |
| <b>C.</b> | <b>Section C. Randomization Scheme .....</b>                                                                   | <b>9</b>  |
| <b>D.</b> | <b>Section D. Study-Drug Dose Adjustment.....</b>                                                              | <b>10</b> |
| <b>E.</b> | <b>Section E. Good Clinical Practice Violations.....</b>                                                       | <b>11</b> |
| <b>F.</b> | <b>Figure S1. Trial Diagrammatic Overview .....</b>                                                            | <b>12</b> |
| <b>G.</b> | <b>Figure S2. Algorithm for low-dose methotrexate management (Part 1).....</b>                                 | <b>13</b> |
| <b>H.</b> | <b>Figure S3. Algorithm for low-dose methotrexate management (Part 2) .....</b>                                | <b>14</b> |
| <b>I.</b> | <b>Figure S4. Participant flow in CIRT.....</b>                                                                | <b>15</b> |
| <b>J.</b> | <b>Figure S5. hsCRP over time by treatment assignment .....</b>                                                | <b>16</b> |
| <b>K.</b> | <b>Table S1. Effects of LD-MTX on biochemical measures during run-in.....</b>                                  | <b>17</b> |
| <b>L.</b> | <b>Table S2. Effects of LD-MTX on biochemical measures from enrollment to 8 months post-randomization.....</b> | <b>18</b> |

## Section A. Lists of Committees and Investigators

**Executive Committee:** Paul Ridker (Chair), Robert Glynn, Brendan Everett, Nina Paynter, Aruna Pradhan, Jean MacFadyen, Elaine Zaharris, Ahmed Hasan

**Clinical Coordinating Center:** Paul Ridker (Chair), Elaine Zaharris, Erin Cunniff, Maria Sanchez, Virak Mam, Harriet Samuelson

**Data Coordinating Center:** Robert Glynn (Chair), Nina Paynter, Jean MacFadyen, Susan Nestor, Aerin Thompson

**National Heart Lung and Blood Institute:** Ahmed Hasan, Yves Rosenberg, Erin Iturriaga, Lawton Cooper, Eric Leifer, Jue Chen, Myron Waclawiw, David Gordon, Michelle Olive, Susan Shurin, Ann Marie Brasile Mejac

**Steering Committee:** Paul Ridker (Chair), Robert Glynn, Brendan Everett, Nina Paynter, Aruna Pradhan, Jean MacFadyen, Elaine Zaharris, Dan Solomon, Peter Libby, Michael Clearfield, Subodh Verma, Milan Gupta, Julie Buring, Ahmed Hasan, Yves Rosenberg, Erin Iturriaga

**Ancillary Study Committee:** Brendan Everett (Co-Chair), Aruna Pradhan (Co-Chair)

**Publications Committee:** Paul Ridker (Co-Chair), Robert Glynn (Co-Chair)

**Endpoint Adjudication Committee:** Brendan Everett (Chair), Aruna Pradhan, Erin Bohula, Patrick Lawler, Natalia Rost, Aneesh Singhal

**Medical Monitors:** Dan Solomon (Chair), Medha Barbhaiya, Deepak Rao, Susan Ritter, Jeffrey Sparks, Sara Tedeschi

**Data Safety Monitoring Board:** Robert Harrington (Chair), Kent Bailey, Christie Ballantyne, Susan Ellenberg, David Fox, Charles Francis, Bernard Gersh, Hannah Lipman, Russell Tracy, William Weintraub, Peter Wilson

**Center for Cardiovascular Disease Prevention Research Associates:** Cassandra Addamo, Leanne Barrett, Kristin Battis, Emily Bryce, Christina Cahill, Samantha Calabrese, Julia Carpenedo, Robert Carrier, Ronald Cassesso, Lin Chen, Peter Choi, Erin Cunniff, Rebecca Danning, Megan Doroshevich, Catherine Duran, Evan Fullerton, Nina Gonzalez-Park, Joseph Grossbard, Sierra Hall, Faye Hisoler, Sidney Jean, Patrick Jolicoeur, Elizabeth Kennedy, Nagina Khudaynazar, Elizabeth Knuff, Gina Kostandy, Akshaya Krishnaswamy, Glen Krugolets, Samantha Kuney, Jeremy Lema-Driscoll, Matthew Lucci, Jean MacFadyen, Virak Mam, Gregory McDonough, Rayan Mgarry, Susan Nestor, Hyun-Il Paik, Emilie Palmer, Weronika Pasciak, Nicole Peterkin, Meghan Rieu-Werden, Axel Schlossberg, Izak Shapiro, Carrie Smith, Soyisha Sylvain, Gwnedolyn Teutsch, Christina Thomas, Aerin Thomson, Astrid Warny, Courtney Wright, Elaine Zaharris

**Investigative Sites:** Mateen Abidi, MD (Hannah Amaza), Marshfield, WI; Rabeea Aboufakher, MD (Dianne Vold), Grand Forks, ND; Waldo Acebo, MD (Dania Acebo), Doral, FL; Temitayo Adegbamigbe, MD (Benjamin Adetunji), Charlotte, NC; Ramesh Adiraju, MD (Jaisy Issac), Bristol, PA; Ashish Agarwal, MD (Nancy Brunetti), Robbinsville, NJ; Gaurav Aggarwala, MD (Kristen Terry), Huntsville, TX; Kevin

Ahlers, MD (Amy Workman), La Vista, NE; Zia Ahmad, MD , St. Louis, MO; Haitham Ahmed, MD (Victoria Rowney), Cleveland, OH; Moiz Ahmed, MD (Amna Ghouse), Katy, TX; Khalid Ahmed, MD (Asmaa Elasad), Flint, MI; Syed Ahsan, MD (Helen Gikas), Detroit, MI; Firas Alani, MD (Ann Ostrander), Saginaw, MI; Lisa Alderson, MD (Mary Lesko), St. Louis, MO; Ramon Alegret, MD (Jessica Palacio), Miami, FL; Matthew Allison, MD (Leander Lazaro), La Jolla, CA; Dale Allison, MD (Michele Richardson), Waco, TX; Deborah Alpert, MD (Maureen Kinsley), Neptune, NJ; Odilon Alvarado, MD (Rickey Parks), Fort Worth, TX; John Ambrose, MD (Sonia Garcia), Fresno, CA; Daniel Anderson, MD (Tamara Bernard), Omaha, NE; Nabil Andrawis, MD (Josefina Manalo), Burke, VA; Nabil Andrawis, MD (Jyotsna Sandil), Manassas, VA; Saadat Ansari, MD (Talal Khan), Huntsville, AL; Nauman Anwar, MD (Uzma Ali), Carrollton, TX; Luis Aponte, MD (Milagros Agosto), Doral, FL; Ahmed Arif, MD (Colleen Zinn), Flint, MI; Raveen Arora, MD (Margo Arora), Anaheim, CA; Rohit Arora, MD (Teresa Todela), North Chicago, IL; Ahmad Aslam, MD (Joan Morrison), Tomball, TX; Manoj Aswani, MD (Su Jin Chang), Thousand Oaks, CA; Mahmoud Atieh, MD (Renee Jackson), Sanford, NC; Marcus Averbach, MD (Elizabeth Christ), Bethlehem, PA; Francis Averill, MD (Kaitlyn Covington ), Clearwater, FL; Mustafa Awan, MD (Erica Tuner), Mobile, AL; Masoud Azizad, MD (Monica Brown), Northridge, CA; Julio Baez-Suarez, MD (Jose Santiago), Caguas, PR; Suchdeep Bains, MD (Sara Quiroz), Stockton, CA; Jeffrey Baker, MD (Shelby Cox), Idaho Falls, ID; Dorothy Banish, MD (Cathy Reams), Covington, LA; Alan Bank, MD (Lisa Boben), Saint Paul, MN; Scott Barclay, DO (Robin Strain), Big Spring, TX; Basel Bari, MD (Karishma Kapil), Scarborough, ON; Boisey Barnes, MD (Donza Brown), Washington, DC; Otis Barnum, DO (Megan Barnum), Natchitoches, LA; Mitchell Baruchin, MD (Reina Vinas), Jersey City, NJ; Seth Baum, MD (Ashlee Mattone), Boca Raton, FL; Harold Bays, MD (Nikki Nockerts), Louisville, KY; Scott Beau, MD (Fujiko Anazawa), Little Rock, AR; Philippe Beaudry, MD (Valerie Reyes), Burlington, ON; Yves Beaudry, MD (Chantal Viau), St. Lambert, QC; Eva Beaulieu, MD (Connie Mcghee), Riverdale, GA; Kevin Bender, MD (Matthew Apelbaum), Tamarac, FL; Laura Benzaquen, MD (Maureen Marre), Chelsea, MA; Olivier Bertrand, MD (Michele Jadin), Quebec City, QC; Antonio Blanco, MD (Jessica Palacio), Miami, FL; Lawrence Block, MD (Sandy Skinner), Salem, MA; Haresh Boghara, MD (Zenaida Cooper), DeSoto, TX; Anna Bortnick, MD (Dalvert Polanco), Bronx, NY; Manuel Bouza, MD (Merlyn Sanchez), Hialeah, FL; Gary Brown, MD (Jennifer Atkinson), Middletown, OH; Clinton Brown, MD (Lorraine Thomas), Brooklyn, NY; John Bryant, MD (Donna Moore), Yorktown, VA; Maurice Buchbinder, MD (Michelle Price), San Diego, CA; Jose Burbano, MD (Gracie Fuentes), Carrollton, TX; Samuel Butman, MD (Alicia Bigelow), Cottonwood, AZ; William Campbell, MD (Theresa Hickey), Jackson, MS; Enrique Carbajal, MD (Margaret Chase), Fresno, CA; Jorge Castriz, MD (Rebekah Southard), Great Falls, MT; Brett Cauthen, MD (Cara Francis), Oklahoma City, OK; James Cha, MD (Judy Otis), Oshawa, ON; Scott Chadderdon, MD (Aynun Naher), Portland, OR; Raja Chehayeb, MD (Chantal Viau), Greenfield Park, QC; Jing Chen, MD (Kailin Lambuth), New Orleans, LA; Jack Chen, MD (Nancy Bryant), Atlanta, GA; Willoon Cheng, MD (Jordan Oud), Tillsonburg, ON; Deanna Cheung, MD (Susana Nieves), Long Beach, CA; Dennis Chodnicki, MD (Sara Shearer), Salisbury, MD; Guy Chouinard, MD (Marie-Claude Boivin), Quebec, QC; Mark Chouinard, MD (DruAnne McMartin), Omaha, NE; Tomas Cieza-Lara, MD (Nancy Lavoie), Chicoutimi, QC; Anthony Clay, DO (Maureen McClelland), Newark, DE; Michael Clearfield, DO (Lisa Johnson), Fairfield, CA; Mylan Cohen, MD (Brenda Glasgow), Scarborough, ME; Steven Cohen, MD (Heather Gawron), Delray Beach, FL; Clancy Cone, MD (Dillon McLeod), Missoula, MT; Gary Conrad, MD (Sadie Seto), Pasadena, CA; James Conway, MD (Shelley Hitchcock), Smiths Falls, ON; Jon Cronin, MD (Mercedes Laranjo), Milton, MA; Jairo Cruz, MD (Maribeth Speerbrecker), Olympia Fields, IL; Frank D'Alessandro, MD (David Mcphail), Lincoln, RI; Sorin Danciu, MD (Lisa Zull), Chicago, IL; Damon Daniels, MD (Timothy Buchanan), Columbia, SC; Michael Danzig, MD (Mary Barr), Fort Myers, FL;

Evelyne Davidson, MD (Heather Thearp), Knoxville, TN; Michael Del Core, MD (Eddy Butkus), Omaha, NE; Joshua DeLeon, MD (Wendy Drewes), Mineola, NY; Anthony DeMaria, MD (Wendy Davila), La Jolla, CA; Pantelis Diamantouros, MD (Sandy Carr), London, ON; John Dieck, MD (Angela Vallejo ), Austin, TX; Michael DiGiovanna, DO (Fouzal Azeem), North Massapequa, NY; David Dobies, MD (Virginia Williamson), Grand Blanc, MI; Sheng-Jing Dong, MD (Brenda Gehin), Madison, WI; Natalie Doyle, MD (Stephanie Hales), Wilson, NC; Timothy Draper, DO (Michele Rybicki), Peabody, MA; Charles Eaton, MD (Jennifer Valiente ), Pawtucket, RI; William Eaves, MD (Melissa Moore), Bossier City, LA; Troy Edwards, DO (Greer Edwards), Lancaster, OH; Freidy Eid, MD (Jennifer Davis), Wichita, KS; Howard Eisen, MD (Janet Matthews), Philadelphia, PA; Bernard Erickson, MD (Peg Dahl), St. Cloud, MN; Michael Farkouh, MD (Julie Lan), Toronto, ON; Atoussa Farough, MD (Gliceria Willis), Woodbridge, VA; Ronald Fernando, MD (Vicki Simpson), Loma Linda, MA; Brian First, MD (Courtney Alcantar), San Diego, CA; Augusto Focil, MD (Paola Martinez), Oxnard, CA; Steven Forman, MD (Ria Ronquillo), Los Alamitos, CA; Michael Foster, MD (Judy Brown), Columbia, SC; Ronald Fowlis, MD (Mary Radyk), Kitchener, ON; Brad Frandsen, MD (Brandon Frandsen), Port Orchard, WA; Richard Friedman, MD (Lynn Arroyo), San Diego, CA; Mark Gabelman, MD (Ana Mendez), North Bergen, NJ; John Gabriel, MD (Isreal Barrientos), North Richland Hills, TX; Mary Gaffney, DO (Jay Jones), Charlotte, NC; Bernard Garcia, MD (Ricardo Zambrano), Fort Lauderdale, FL; Gregory Garrioch, MD (Julie Clement), Sudbury, ON; Daniel Gaudet, MD (Jocelyne Delisle), Chicoutimi, QC; John George, MD (Jennifer Thomas-Beasley), Dallas, TX; Anu George, MD (Chris Stewart), Falls Church, VA; Merdod Ghafouri, DO (Abbey Delozier), Manassas, VA; Laurence Gibbs, MBChB (Mary Jane Ross), Thedford, ON; Paul Giles, MD (Megan Guin), Vidalia, GA; Jay Giri, MD (Elizabeth Medenilla), Philadelphia, PA; Howard Glass, DO (Pam Tiernan), Westbrook, ME; Gary Gleason, DO (Mi Miao), Spokane, WA; Samuel Goldhaber, MD (Ruth Morrison), Boston, MA; Enrique Gonzalez, MD (Mayra Vazquez), Los Angeles, CA; John Gordon, MD (Bette Mahan), San Diego, CA; Bruce Graham, MD (Erin Loomis), Muncie, IN; James Gray, MD (Terina Weir), Fayetteville, TN; C. Patrick Green, MD (Sara Turner), Loveland, CO; Gerald Greer, MD (Bobbi Phillips), Little Rock, AR; Narien Grover, MD (Linh Ta), Whitehall, PA; Mahendra Gunapooti, MD (Brett Snodgrass), St. Peters, MO; Milan Gupta, MD (Fitzgerald Christie), Brampton, ON; Sunil Gupta, MD (Michelle Parrish ), Wesley Chapel, FL; Paul Gurbel, MD (Cesselle Barbour), Lutherville, MD; Enrique Gutierrez, MD (Rose-Marie Aveloo), Kissimmee, FL; Fadi Hage, MD (Badhma Valaiyapathi), Birmingham, AL; Elie Hage-Korban, MD (Ashley Childs), Jackson, TN; John Hakim, MD (Cynthia Shannon), Clinton, MD; Glenn Hamroff, MD (Cindy Pankovic), Cortlandt Manor, NY; Alex Harrison, MD (Katy Harrison ), Santa Maria, CA; Michael Hartleib, MD (Rebecca Otis), Peterborough, ON; David Headley, MD (Debbie Spencer), Port Gibson, MS; Robert Henry, MD (Elsa Diaz), San Diego, CA; Lee Herman, MD (Cynthia Nealy), Suwanee, GA; Paul Hermany, MD (Susan Meissner-Dengler), Sellersville, PA; Allan Hess, MD (Catherine Mcpherson), Newmarket, ON; David Hinchman, MD (Kathleen Luck), Boise, ID; Edward Horton, MD , Boston, MA; Priscilla Hsue, MD (Danny Li), San Francisco, CA; Daniel Humiston, MD (Stephanie Rodriguez), Farmington, UT; Mark Huth, MD (Jean Anne Eisenhaure), Medford, OR; John Ijem, MD (Ellen Smith), Pawleys Island, SC; George Isajiw, MD (Sandra Grande), Lansdowne, PA; Kenneth Izuora, MD (Amrita Patel), Las Vegas, NV; Nigel Jagan, MD (Lalitha Jagan), Whitby, ON; Ajay Jagota, MD , Pickering, ON; Nitin Jaluria, MD (Heather Reigle), Harrisburg, PA; Dory Jarzabkowski, DO (Pam Schwartzkopf), Normal, IL; Albert Johary, MD (China Wells), Dunwoody, GA; James Johnston, MD (Lisa Hickey), Mississauga, ON; Michael Johnstone, MD (Margaret Michaelian), Boston, MA; Alan Jones, MD (Lori Bartholomaus), Vancouver, WA; Kenneth Jutzy, MD (Hadi Baig), Loma Linda, CA; Nikhil Kapoor, MD (Nidhi Kapoor), Long Beach, CA; Tshiswaka Kayembe, MD (Kathleen Kayembe), St. Louis, MO; Michael Keogh, MD (Marisol Hernandez), Reno, NV; Waqar Khan, MD (Moniba

Rizvi), Tomball, TX; Radoslaw Kiesz, MD (Bartlomiej Gora), San Antonio, TX; Nomita Kim, MD (Barbara Fortanelly), Austin, TX; Alan Kivitz, MD (Pam Morrison), Duncansville, PA; William Kopfler, MD (Charlie Shelton), Hammond, LA; Andras Koser, MD (Dale Cook), Spartanburg, SC; Vipin Koshal, DO (Lynn Petrik), Athens, OH; William Kostis, MD (Angie Hughes), New Brunswick, NJ; Anupama Kottam, MD (Biljana Basic-Panic), Detroit, MI; Arvind Krishna, MD (Brandi Kerr), Canton, OH; Muthu Krishnan, MD (Nichole Choate), Osage Beach, MO; Anil Kumar, MD (Anita Suri), Lancaster, CA; Vikram Kumar, MD (Johanna Hartmiller), Westlake, OH; Tak Kwan, MD (Joyce Tsang), New York, NY; Roger Labonte, MD (Monique Burke), Sudbury, ON; Ajay Labroo, MD (Chrissie Lopez), Moline, IL; Charles Landau, MD (Tina Cullen), Trumbull, CT; Joel Landzberg, MD (Rhama Reyes), Westwood, NJ; Eugene Langevin, DO (Sheryl Faucett), Joplin, MO; Joe Lau, MD (Stanly Johnson), New Hyde Park, NY; Michel Le May, MD (Tanya Abarbanel), Ottawa, ON; Gregory Ledger, MD (Zella Holmes), Springfield, MO; Gustavo Ledo-Sanchez, MD (Aniuska Ruiz), Hialeah, FL; Eugene Lee, MD (Hunter Smothers), Mather, CA; William Liang, MD (June Grundy), Hamilton, ON; Joshua Liberman, MD (Cindy Lessila), Milwaukee, WI; Stephen Lupovitch, MD (Samantha Bellini), Arlington Heights, IL; Lawrence Madoff, MD (Mia Jimenez), Las Vegas, NV; Shaista Malik, MD (Ashwini Erande), Orange, CA; Shafiq Mamdani, MD (Lina Felix), Providence, RI; Hubert Manning, MD (Seema Sukhu), Brampton, ON; Samer Mansour, MD (Caroline Vallieres), Montreal, QC; Vanessa Marin, MD (Rae Woods), Albuquerque, NM; Lisa Martin, MD (Lorraine Marshall), Washington, DC; Mark Martin, DO (Troy Gunter), Evansville, IN; Ronald Mastouri, MD (Elise Hannemann), Indianapolis, IN; Genevieve Mathieu, MD (Chantal Viau), St. Lambert, QC; Kreton Mavromatis, MD (Risha Patel), Decatur, GA; John McClure, MD (Ruth Ferguson), Saginaw, MI; Brian McCormick, MD (Jennifer Kiser), Hampton, VA; Martin McGough, MD, Rochester Hills, MI; Frank McGrew, MD (Kimberly Briscoe), Germantown, TN; Donald McNeil, MD (Joseph Schulze), Columbus, OH; Sundeep Mediratta, MD (Ashley DuPont), Orlando, FL; Carlos Mego, MD (Christine Rivas), McAllen, TX; Alan Meholick, MD (Lahneen Black), Buffalo, NY; Jim Melton, DO (Brad Hightower), Oklahoma City, OK; Robert Mendelson, MD (Tofura Ullah), Jamaica, NY; Adrian Messerli, MD (Alexandra Hull), Lexington, KY; Nabeela Mian, MD (Kristina Griffiths), Wilkes-Barre, PA; Anthony Miccio, MD (Mario Domingo), Flanders, NJ; David Miller, DO (Ginger Brounce), Morrisville, PA; Wendy Miller, MD (Coleen Tessmar), Royal Oak, MI; Stephen Miller, MD (Kristin Gleaton), Walterboro, SC; Umesh Mishra, DO (Susan Felpel), Ephrata, PA; Freny Mody, MD (Svetlana Strugatsky), Los Angeles, CA; Manuel Montero, MD (Rachel Ipock), New Bern, NC; Michael Morris, MD (Raketra Knight), Smyrna, GA; John Morytko, MD (Katherine Shatsky), Miami, FL; Moustafa Moustafa, MD (Stephanie DiRenzo), Orangeburg, SC; Mehdi Muhammad, MD (Alam Khuwaja), Sugar Land, TX; Ashok Mukherjee, MD (Bev Bozek), Scarborough, ON; Angel Mulkay, MD (Bikash Saha), Teaneck, NJ; Syed Mumtaz, MD (Kanza Chaudhay), Kissimmee, FL; John Murray, MD (Sherrie Baker), Nashville, TN; Jonathan Murrow, MD (Alyssa Smith), Athens, GA; V Shrinivas Murthy, MD (Maggie Miller), Milwaukee, WI; Anthony Nappi, MD (Wendy Stewart), Albany, NY; Michael Nicholas, DO (Pamela Kulam), Dyer, IN; William Nixon, MD (Cynthia Abath), Guntersville, AL; Nduka Nwadiaro, MD (Tiffany Laporte), Windsor, ON; Cyril Ofori, MD (Phyllis Kilner), Wooster, OH; Christopher Oh, MD (Terri Nielson), Salinas, CA; Daniel O'Rourke, MD (Sarah Beaudry), White River Junction, VT; Jiafu Ou, MD (Marie White), St. Louis, MO; Stanford Owen, MD (Anne Andry), Gulfport, MS; Luigi Pacifico, DO (Anne McDonald), Worcester, MA; Francisco Padron, MD (Norys Duconger), Hialeah, FL; Emmanuel Papasifakis, DO (Oluwafemi Showole), Garden City, MI; John Parker, MD (Elaine Hsu), Toronto, ON; Jessica Pena, MD, New York, NY; John Peniston, DO (Annette Fudala), Feasterville, PA; Sean Peterson, MD (Lisa VanSickle), Sarnia, ON; Noel Peterson, MD (Audra Allen), Greenville, NC; Karlton Pettis, MD (Samantha Jamison), Charlotte, NC; Denis-Carl Phaneuf, MD (Katia Drouin), Terrebonne, QC; Steven Piacentine, MD (Lori Pritchard),

Schenectady, NY; Leonard Pianko, MD (Priscilla Borges), Aventura, FL; Richard Pish, MD (Renee Clark), Uniontown, PA; Petr Polasek, MD (Deb Schlapbach), Kelowna, BC; Tamar Polonsky, MD (Tiffany Hart), Chicago, IL; Dan Pulsipher, DO (Katie Leonard), Weeki Wachee, FL; Jagadish Puppala, MD (Mundae McGettes), Mineral Wells, TX; Ofsman Quintana, MD (Claudia O'Brien), McAllen, TX; Donald Raddatz, MD (Catherine Gilmore), Cooperstown, NY; Emilio Raimondo, MD (Mary Swatton), St. Cathannes, ON; Kodangudi Ramanathan, MD (Lillie Johnson), Memphis, TN; Preeti Ramappa, MD (Kathleen Covert), Detroit, MI; Santiago Ramirez, MD (Nicole Ciffone), Tucson, AZ; Sahadeo Ramnauth, MD (Susan Ingenito), Flushing, NY; Steven Ramos, MD (Jennifer Aparicio), San Antonio, TX; Sunilkumar Rao, DO (Renee Saylor), Grand Blanc, MI; Vijay Rao, MD (Stephanie Alford), Indianapolis, IN; Michael Rave, MD (Kim Stark), Morehead City, NC; Rajneesh Reddy, MD (Melanie Bentley), Halton City, TX; Mohan Reddy, MD (Christine Conner), St. Petersburg, FL; Sean Reinhardt, MD (Mary Bongarzone), Doylestown, PA; Shabbir Reza, MD (Cynthia Reed), Biddeford, ME; Kamran Riaz, MD (Christina Weller), Dayton, OH; Lucian Rice, MD (Juliana Turner), Asheville, NC; Randall Richwine, DO (Penny Pazier), Fort Worth, TX; James Rider, MD (Wendy Marach), Green Bay, WI; James Roberts, MD (Laura Meyer), Toledo, OH; Kathryn Rohr, MD (Serena Crowley), Auburn, ME; Chanwit Roongsritong, MD (Bridget Neumann), Reno, NV; Alan Rosenbloom, MD (Susan Snape), Cornwall, ON; Robert Rosenson, MD (Qinzhong Chen), New York, NY; Sherryn Roth, MD (Pujitha Rao), Scarborough, ON; Randolph Rough, MD (Deb French), West Des Moines, IA; Steven Rowe, MD (Uriah Atkinson), Springfield, MO; Joseph Sacco, MD (Michele Rawlins), Albany, NY; Arshad Safi, MD (Cindy Green), Chambersburg, PA; Satinder Saini, MD (Bobbie Bullock), Crowley, LA; Mohammad Saklayen, MD (Carol Miller), Dayton, OH; Abraham Salacata, MD (Mary McQuarrie), Alpena, MI; Lawrence Santora, MD (Karena de la Mora), Orange, CA; Zahid Sardar, MD (Marium Anwar), St. Thomas, ON; Ian Sarembock, MD (Cynthia DeFosse), Cincinnati, OH; Michele Sartori, MD (Antonio Cantu), Houston, TX; Sanjeev Saxena, MD (Rebecca Beaman), Fort Payne, AL; John Schmedtje, MD (Cathleen Furry), Roanoke, VA; Jay Schmidt, MD (Janie Propst), Lenoir, NC; Linda Schneider, MD (Tulia Askew), Hampton, VA; Robert Schnitzler, MD (Lolita Kirschbaum), San Antonio, TX; Steven Schwartz, MD (Raeleen Grabeau), Nashua, NH; David Schwartz, MD (Jean Flanagan), St. Louis, MO; Robert Schweikert, MD (Tonya Frederick), Akron, OH; Roger Seagle, MD (Tyra Seagle), Morganton, NC; Barry Seidman, MD (Irma Muller), Delray Beach, FL; Munni Selagamsetty, MD (Sanjeeva Selagamsetty), Colorado Springs, CO; Norma Severino-Pacheco, MD (Magdaliz Figueroa), Canovanas, PR; Anil Shah, MD (Manu Dhawan), Santa Ana, CA; Mahesh Shah, MD (Melissa Harris), Prince Frederick, MD; Paul Shapero, MD (Deborah Storm), Bangor, ME; David Shavelle, MD (Jorge Caro), Los Angeles, CA; Steven Shayani, MD (Patty Hodnett), Mineola, NY; Victor Shin, MD (Taylor Kells), Providence, RI; Yolanda Sierra Quinones, MD (Gloria Ramos), Levittown, Toa Baja, PR; Jay Silverberg, MD (Fiona Stone), Toronto, ON; Debra Simmons, MD (Juliana Dorsch), Salt Lake City, UT; William Simon, DO (Katlyn Grimes), Wichita, KS; Sewa Ram Singal, MD (Amandeep Sidhu), North York, ON; Dinesh Singal, MD (Christine Dalcomine), Somerset, NJ; Narendra Singh, MD (Charlotte Mall), Cumming, GA; Narendra Singh, MD (Sam Codogan), Tucker, GA; Deovrat Singh, MD (Brenda Newman), Indianapolis, IN; Linda Sinnaeve, MD (Julia Jarecshi), Chatham, ON; Chokkalingam Siva, MD (Meg Duffy), Columbia, MO; Hanna B. Slim, MD (Victoria Dow), Plattsburgh, NY; Suzanne Sorof, MD (Shelley Fuentes), Mesa, AZ; Miguel Sosa-Padilla, MD (Mayra Ayala), San Juan, PR; Rodolfo Sotolongo, MD (Bobbi Skiles), Beaumont, TX; Peter Spadafora, MD (Elizabeth Illsley), Guelph, ON; Sunny Srivastava, MD (Lori Brazee), Haverhill, MA; Francois St. Maurice, MD (Chantal Viau), Brossard, QC; Paul Staab, MD (Wanda Phillips), Marrero, LA; Lloyd Stahl, MD (Elizabeth Fulks), Independence, MO; John Stimac, MD (Cathy Gowing), Hamilton, ON; Marcus Stoddard, MD (Rita Longaker), Louisville, KY; David Stoll, MD (Krista Ward), Penticton, BC; Janet Strain,

MD (Christine Kunz), Ridgewood, NJ; Areena Swarup, MD (Sameer Salama), Phoenix, AZ; Gurcharan Syan, MD (Cindy Bobbie), Sudbury, ON; Arie Szatkowski, MD (Diana Barker), Southaven, MS; James Talano, MD (Michael Halbert), Naples, FL; Julio Tallet, MD (Smelda Ferrin), Pembroke Pines, FL; John Tan, MD (Sharon Magro), Dallas, TX; Neeraj Tandon, MD (Karen Johnson), Shreveport, LA; Steven Tang, MD (JoLynn Hartman), Eustis, FL; Alan Tannenbaum, MD (Kate Mcgarr), Ft. Myers, FL; Manzoor Tariq, MD (Britney Gassier), Festus, MO; Ahmed Tawakol, MD (Brian Tung), Boston, MA; Jeff Taylor, MD (Judy Kolibas), Hillsborough, NJ; Udho Thadani, MD (David Alexander), Oklahoma City, OK; Maitreya Thakkar, MD (Albrie Tucker), Rocky Mount, NC; Avni Thakore, MD (Nicole Noonan), New Hyde Park, NY; Omar Tirmizi, MD (Deepa Chand), Culver City, CA; Annette Toledano, MD (Nilay Mehta), Coconut Creek, FL; Charles Treasure, MD (Lisa Treasure), Knoxville, TN; Huu Truong, MD (Sandra Velasquez), Tucson, AZ; Stanley Tucker, MD (Debby Lewis), Mechanicsville, VA; Christopher Unrein, DO (Jacquelyn Waller), Parker, CO; Douglas van Fossen, MD (Maranda Durant), Westerville, OH; Jose Vazquez-Tanus, MD (Joan Cruz), Ponce, PR; Azim Velji, MD (Anna Velji), Niagara Falls, ON; Subodh Verma, MD (Randi Elituv), Toronto, ON; Rajiv Verma, MD (Denise White), Dalton, GA; Nampalli Vijay, MD (Melinda Washam), Denver, CO; Sridhar Vijayasekaran, MD (Anthony Franklin), Corvallis, OR; Saul Vizel, MD (Beverly Fox), Cambridge, ON; Craig Vogel, DO (Miriam Johnson), Jupiter, FL; Kishor Vora, MD (Susie Carmon), Owensboro, KY; John Vyselaar, MD (Kam Chauhan), North Vancouver, BC; Douglas Waggoner, MD (Emily Kelley), Spokane, WA; Andreas Wali, MD (Danielle Schade), Camp Hill, PA; Jasjit Walia, MD (Harpreet Sheena), Linden, NJ; Damandeep Walia, MD (Linda Long), Kansas City, MO; Samuel Ward, MD (Tara Grassi-Friedman), Erie, PA; Robert Watson, MD (Renee Troy), Abington, PA; Sandra Weiss, MD (Ann Marie Lenoir), Glen Mills, PA; Timothy Wessel, MD (Alice Boyette), Gainesville, FL; Robert Westcott, MD (Kristi Burroughs), Lindsay, OK; Lindsey White, MD (Billee Payne), Elizabeth City, NC; David Wilkett, DO (Sherrita Sweet), Tulsa, OK; Vance Wilson, MD (Terry Purcell), Daytona Beach, FL; Scott Wilson, MD (Philip Bergeron), Cumberland, RI; Stuart Zarich, MD (Valerie Assalone), Bridgeport, CT; Brian Zidel, MD (Vrijender Singh), Mississauga, ON;



## Section B. Trial Inclusion and Exclusion Criteria

|                                                                                                                           |                                                                                                                                                                                                                                                                                                                                                                                                                                                                                                                                                                                                                                                                                                                                                                                                                                                                                                                                                                                                                                                                                                                                                                                                                                                                                                                                                                                                |
|---------------------------------------------------------------------------------------------------------------------------|------------------------------------------------------------------------------------------------------------------------------------------------------------------------------------------------------------------------------------------------------------------------------------------------------------------------------------------------------------------------------------------------------------------------------------------------------------------------------------------------------------------------------------------------------------------------------------------------------------------------------------------------------------------------------------------------------------------------------------------------------------------------------------------------------------------------------------------------------------------------------------------------------------------------------------------------------------------------------------------------------------------------------------------------------------------------------------------------------------------------------------------------------------------------------------------------------------------------------------------------------------------------------------------------------------------------------------------------------------------------------------------------|
| <b>Inclusion Criteria</b>                                                                                                 | <ul style="list-style-type: none"> <li>• Age <math>\geq</math> 18 years</li> <li>• Myocardial infarction in the past <i>and/or</i> multivessel coronary artery disease by angiography</li> <li>• Type 2 diabetes <i>and/or</i> metabolic syndrome</li> <li>• Completed all planned revascularization procedures</li> <li>• Medically stable for 60 days from index MI, surgical procedure or other significant illness (including newly diagnosed diabetes)</li> </ul>                                                                                                                                                                                                                                                                                                                                                                                                                                                                                                                                                                                                                                                                                                                                                                                                                                                                                                                         |
| <b>Exclusion Criteria</b>                                                                                                 | <ul style="list-style-type: none"> <li>• Chronic liver disease</li> <li>• Chronic inflammatory condition such as lupus or rheumatoid arthritis, ulcerative colitis or Crohn's disease</li> <li>• Chronic infectious disease</li> <li>• Interstitial lung disease or pulmonary fibrosis</li> <li>• Myeloproliferative disease in past 5 years</li> <li>• HIV positive</li> <li>• Requirement for, or intolerance to, methotrexate or folate</li> <li>• History of non-basal cell malignancy or treatment for lymphoproliferative disease in past 5 years</li> <li>• Requirement for use of drugs that alter folate metabolism</li> <li>• History of alcohol abuse or unwillingness to limit consumption to &lt; 4 drinks per week</li> <li>• Women of childbearing potential (even if using oral contraceptive agents) or intention to breastfeed</li> <li>• Men who plan to father children during the study period or are unwilling to use contraception</li> <li>• Life expectancy &lt; 3 years or unlikely to comply in judgment of investigator</li> <li>• Chronic use of oral or IV steroid therapy or other immunosuppressive or biologic response modifiers (see drug list in Manual of Operations)</li> <li>• History of hepatitis B or C</li> <li>• Chronic pericardial effusion, pleural effusion or ascites</li> <li>• New York Heart Association Class IV heart failure</li> </ul> |
| <b>Additional criteria used to exclude patients from continuing in the trial after the active treatment run-in phase:</b> | <ul style="list-style-type: none"> <li>• Willingness to continue with trial</li> <li>• Patient was not deemed appropriate for randomization in the opinion of the investigator</li> <li>• New symptoms indicating low-dose methotrexate intolerance and/or laboratory assay changes indicating intolerance to low-dose methotrexate <ul style="list-style-type: none"> <li>○ WBC &lt; <math>3.5 \times 10^3</math>/uL</li> <li>○ Hematocrit &lt; 32 percent</li> <li>○ AST/ALT &gt; 1.5 upper limit of normal</li> <li>○ Platelet &lt; <math>75 \times 10^3</math>/uL</li> <li>○ Albumin &lt; lower limit of normal</li> <li>○ Creatinine &lt; 40ml/min (as estimated with the Cockcroft-Gault equation)</li> </ul> </li> </ul>                                                                                                                                                                                                                                                                                                                                                                                                                                                                                                                                                                                                                                                                |

**Section C. Randomization Scheme**

Randomized treatment assignment was done by the Electronic Data Capture (EDC) system at the time of qualification and neither the sequence nor the allocation could be obtained in advance. Dynamic allocation was used to assign participants across the strata maintaining the minimum imbalance. At each dispensing visit by a participant, the EDC directed the site regarding the blinded drug pack to allocate. All participants, sites, investigators, staff, and endpoint adjudicators, except for the Data Coordinating Center staff preparing the unblinded DCC reports, were blinded to individual treatment assignment until the end of study visit occurred. This was accomplished through use of the placebo medication, the concealment of treatment assignment in the EDC system, and the potential for sham dose adjustments.

**Section D. Study-Drug Dose Adjustment**

A computerized algorithm based upon blinded levels of centrally measured laboratory parameters and reported symptoms assessed every 2 months was used to adjust the dose of methotrexate or placebo in a standardized manner at all sites. For example, the algorithm could reduce study drug by 5-mg increments (or hold dosing altogether) in response to a decline in the white blood cell or platelet count, an increase in liver function tests, or following the development of an intercurrent illness such as infection or hospitalization for non-trial clinical events. Board certified rheumatologists served as medical monitors for the trial, sending email notices to all sites when a change in medication was required, when a potentially unsafe laboratory value became apparent, or when temporary or permanent discontinuation of study drug was required. Sites were blind to all routine laboratory evaluations except in circumstances where an extreme abnormality was observed requiring clinical intervention. The medical monitors also reminded sites by email to re-start study drug when transient risks had subsided, when laboratory abnormalities had normalized, or reported symptoms resolved.

**Section E. Good Clinical Practice Violations**

During the conduct of the trial, it was discovered through careful record review by staff at the Clinical Coordinating Center that a small cluster of clinical sites in Miami, Florida appeared to be randomizing the same patient into the trial on multiple occasions, such that an individual patient might represent two, three or four separate randomizations. Once this violation of Good Clinical Practice was identified, the trial leadership brought concerns regarding patient safety and data quality from these sites to the relevant Institutional Review Boards, the Data and Safety Monitoring Board, the National Heart Lung and Blood Institute, the Office for Human Research Protections at Health and Human Services, and the US Food and Drug Administration. After extensive consultation with all regulatory parties involved, a decision was unanimously made to protect the integrity of trial data and patient safety; as such, participant data (representing 174 randomizations) in the greater Miami area were excluded from data analysis and 17 sites where concern had been raised were terminated from further participation. This decision was further reviewed by the trial Data and Safety Monitoring Board and approved by the NHLBI. All of the above events occurred prior to trial unblinding.

Figure S1. Trial Diagrammatic Overview

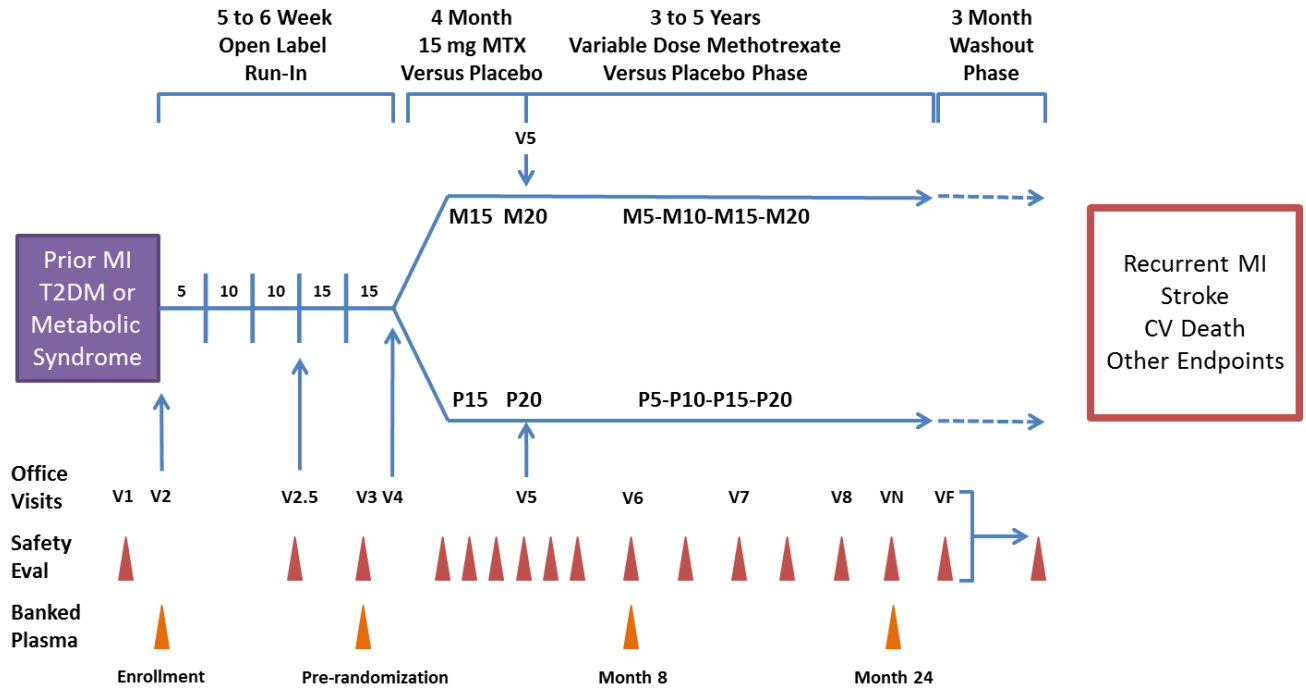

Figure S2. Algorithm for low-dose methotrexate management (Part 1)

| Lab                            | Value             | 5mg                             | 10mg                             | 15mg                             | 20 mg                          |
|--------------------------------|-------------------|---------------------------------|----------------------------------|----------------------------------|--------------------------------|
| WBC (n/uL)                     | ≥ 3,500           | ↑ to 10mg if all conditions met | ↑ to 15 mg if all conditions met | ↑ to 20 mg if all conditions met | Maintain if all conditions met |
|                                | ≥ 3,000 to <3,500 | Do not increase                 | Do not increase                  | ↓ to 10 mg                       | ↓ to 15 mg                     |
|                                | < 3,000           | Temporary stop                  | Temporary stop                   | Temporary stop                   | Temporary stop                 |
| Platelets (n/uL)               | ≥75,000           | ↑ to 10mg if all conditions met | ↑ to 15 mg if all conditions met | ↑ to 20 mg if all conditions met | Maintain if all conditions met |
|                                | 50,000 to <75,000 | Do not increase                 | Do not increase                  | Do not increase                  | ↓ to 15 mg                     |
|                                | <50,000           | Temporary stop                  | Temporary stop                   | Temporary stop                   | Temporary stop                 |
| Creatinine Clearance (mL/min)  | ≥40               | ↑ to 10mg if all conditions met | ↑ to 15 mg if all conditions met | ↑ to 20 mg if all conditions met | Maintain if all conditions met |
|                                | ≥30 to <40        | Do not increase                 | Do not increase                  | Do not increase                  | ↓ to 15 mg                     |
|                                | <30               | Temporary stop                  | Temporary stop                   | Temporary stop                   | Temporary stop                 |
| AST, ALT                       | ≤1.5x ULN         | ↑ to 10mg if all conditions met | ↑ to 15 mg if all conditions met | ↑ to 20 mg if all conditions met | Maintain if all conditions met |
|                                | 1.5 to ≤2.0x ULN  | Do not increase                 | ↓ to 5 mg                        | ↓ to 10 mg                       | ↓ to 15 mg                     |
|                                | >2.0x ULN         | Temporary stop                  | Temporary stop                   | Temporary stop                   | Temporary stop                 |
| Hematocrit                     | ≥27%              | ↑ to 10mg if all conditions met | ↑ to 15 mg if all conditions met | ↑ to 20 mg if all conditions met | Maintain if all conditions met |
|                                | <27%              | Temporary stop                  | Temporary stop                   | Temporary stop                   | Temporary stop                 |
| Clinically important symptoms* | No                | ↑ to 10mg if all conditions met | ↑ to 15 mg if all conditions met | ↑ to 20 mg if all conditions met | Maintain if all conditions met |
|                                | Yes               | Temporary stop                  | Temporary stop                   | Temporary stop                   | Temporary stop                 |

\*New and persistent stomatitis, vomiting, diarrhea, unexplained cough with fever or shortness of breath

In addition to the above, if the ALT or AST is > 1.3x ULN on 3 of any 5 consecutive measures OR if the albumin is <0.8 x LLN on 2 consecutive visits, then the medical monitor will review the case  
Further, if any laboratory or symptom based temporary stop occurs on 3 consecutive measures then the medical monitor will review the case to consider Re-Initiation, a continued Temporary Stop, or a Permanent Stop

Figure S3. Algorithm for low-dose methotrexate management (Part 2)

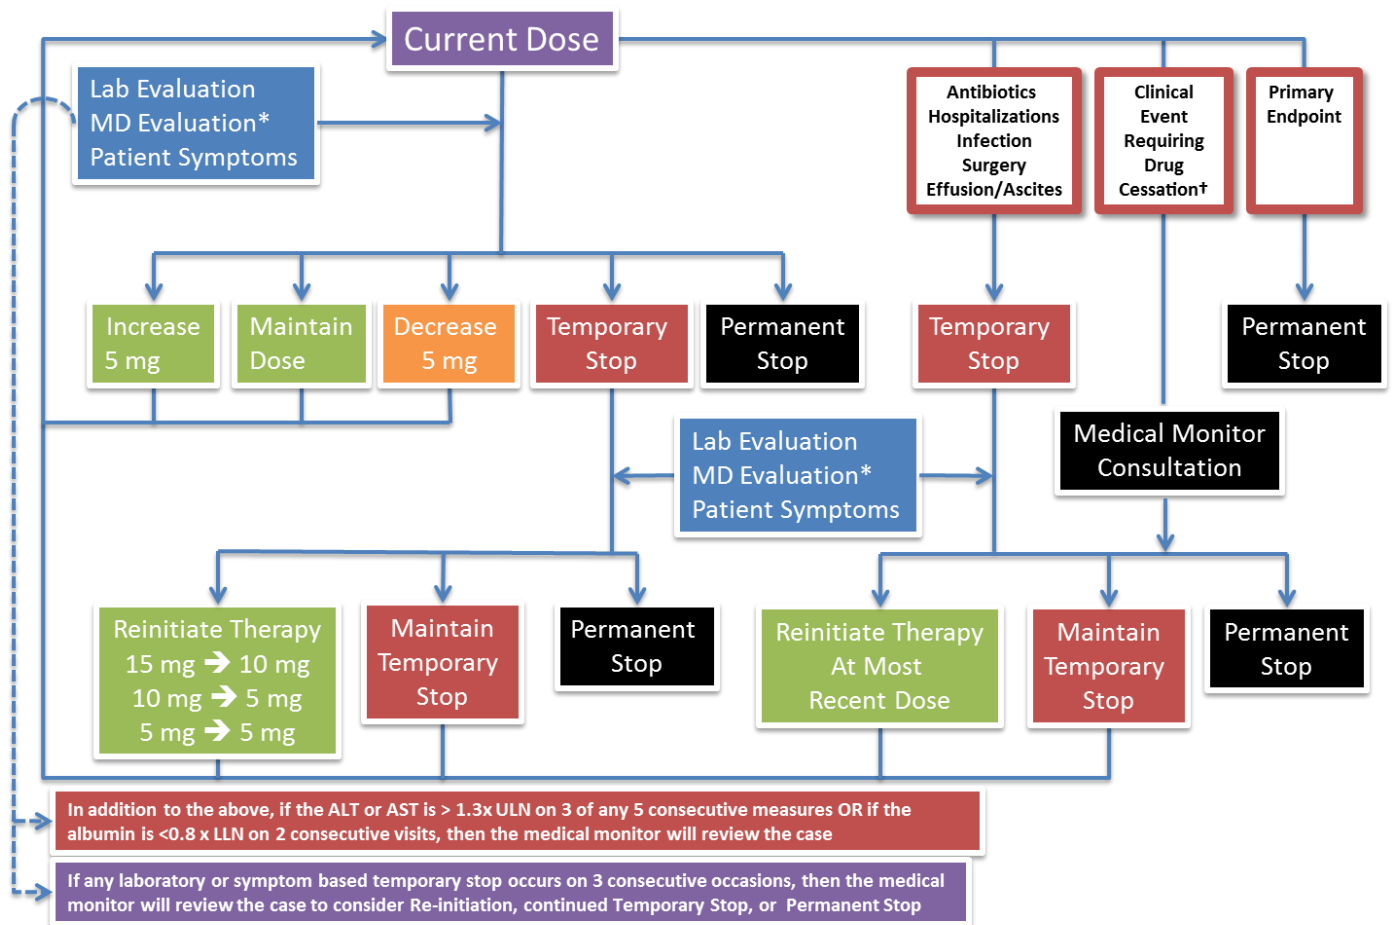

\*Cancer (except non-melanoma skin cancer), chronic infection (e.g. HIV, hepatitis B or C, tuberculosis), cirrhosis, chronic need for exclusionary medication, life threatening fungal infection

Figure S4. Participant flow in CIRT

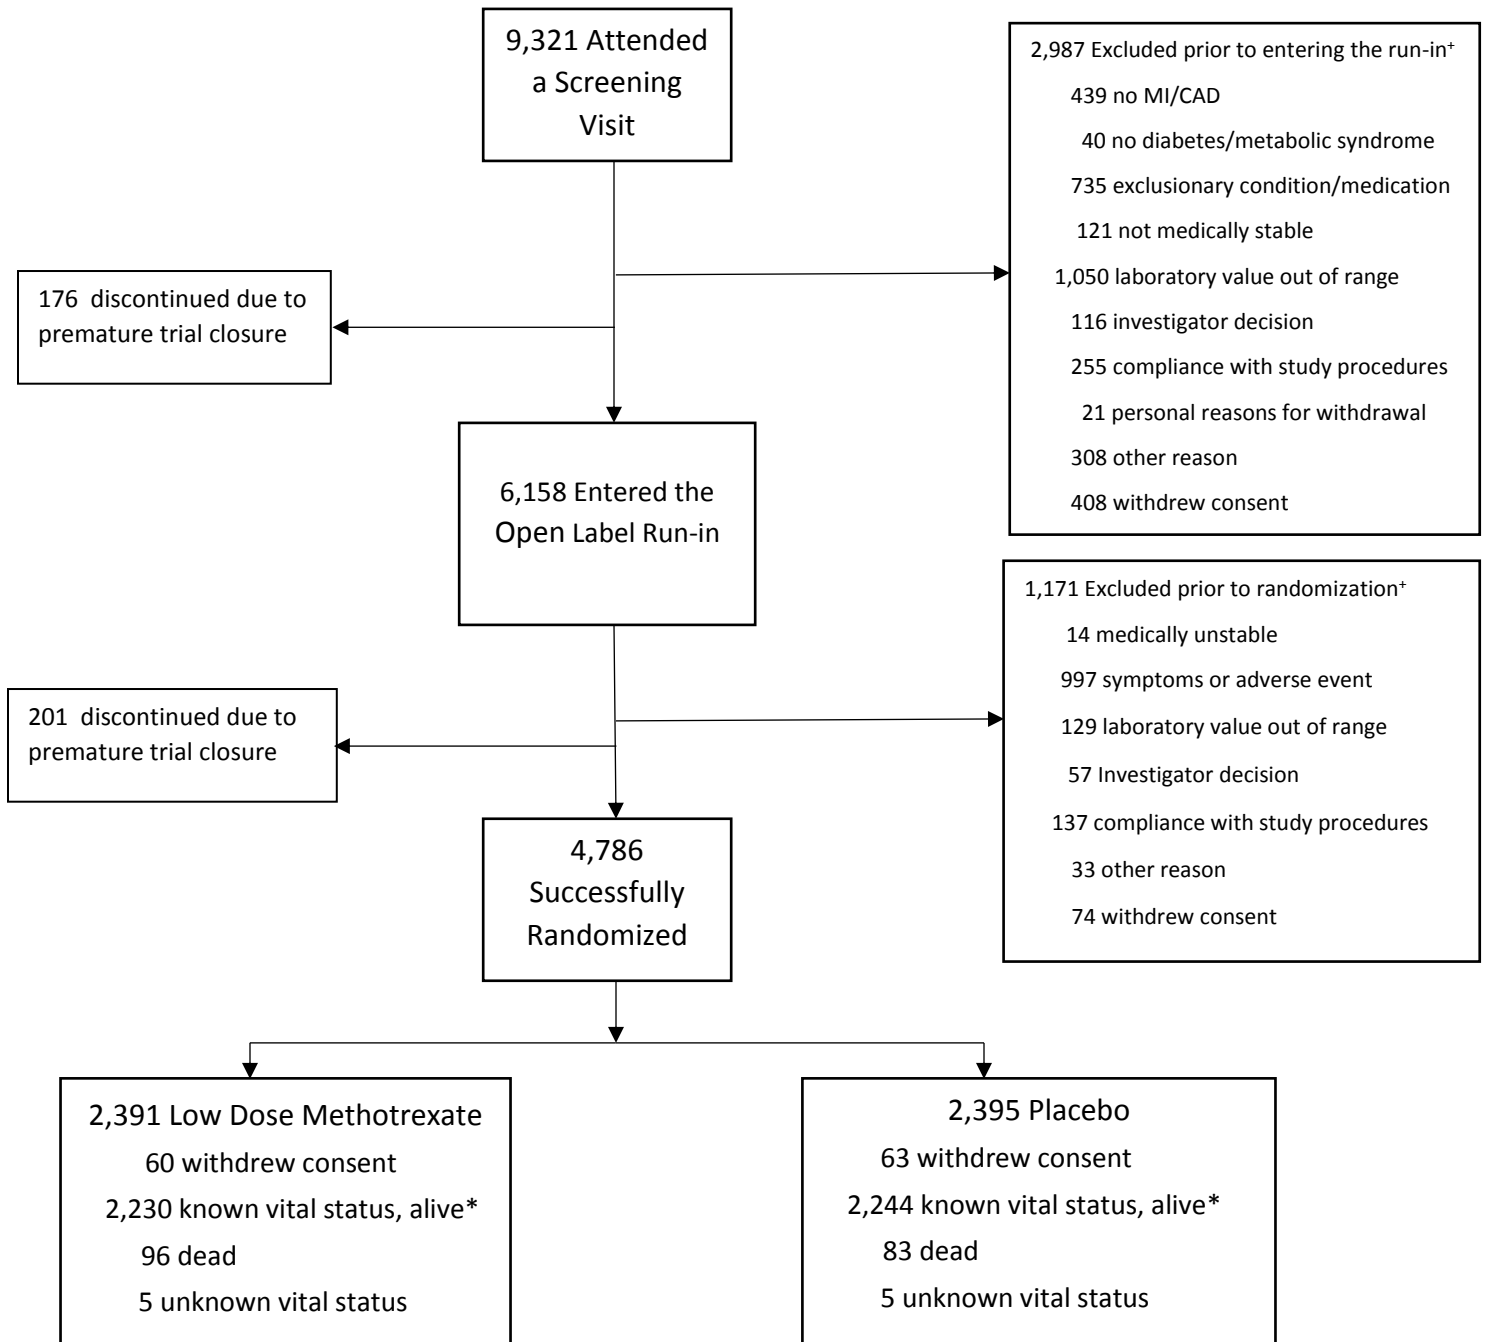

\* Within 3 months of trial end. \*Participants may have multiple reasons for exclusion.



Figure S5. hsCRP over time by treatment assignment

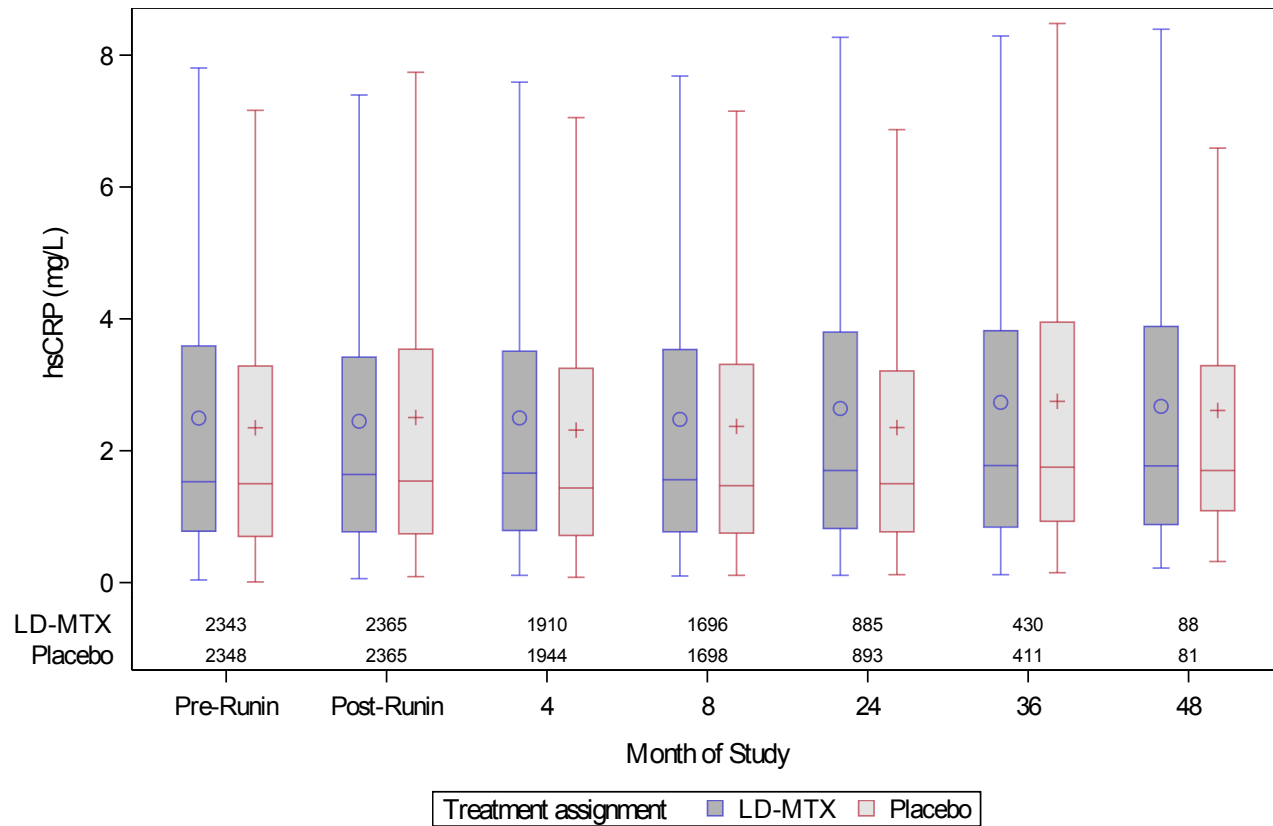

Data are presented as the median(line), mean(circle) and interquartile range; whiskers extend to the extremes of the data or to one and a half times the interquartile range, whichever was closer

**Table S1. Effects of LD-MTX on biochemical measures during open label run-in among randomized participants. All data reported as median (Interquartile Range).**

| Biochemical Measure              | Enrollment        | Post Run-in       | Change           | P-value for change* |
|----------------------------------|-------------------|-------------------|------------------|---------------------|
| ALT (IU/L)                       | 21.0(16.0,28.0)   | 24.0(18.0,31.0)   | 2.0(-1.0,7.0)    | <0.0001             |
| AST (IU/L)                       | 20.0(17.0,24.0)   | 22.0(18.0,26.0)   | 1.0(-2.0,4.0)    | <0.0001             |
| Mean Corpuscular Hemoglobin (pg) | 30.0(28.8,31.1)   | 30.3(29.0,31.4)   | 0.2(-0.1,0.7)    | <0.0001             |
| Mean Corpuscular Volume (fl)     | 90.0(87.0,93.0)   | 91.0(88.0,94.0)   | 1.0(0.0,2.0)     | <0.0001             |
| WBC (x10E3/uL)                   | 7.0(6.0,8.3)      | 6.7(5.6,7.9)      | -0.4(-1.1,0.4)   | <0.0001             |
| Hematocrit (%)                   | 42.3(39.6,44.9)   | 41.8(39.0,44.3)   | -0.7(-2.0,0.9)   | <0.0001             |
| Hemoglobin (g/dL)                | 14.1(13.0,15.0)   | 13.9(12.8,14.8)   | -0.2(-0.7,0.2)   | <0.0001             |
| hsCRP (mg/L)                     | 1.51(0.74,3.44)   | 1.60(0.76,3.50)   | 0.04(-0.50,0.61) | 0.0003              |
| LDL-C (mg/dL)                    | 68.0(54.0,87.0)   | 67.0(52.0,86.0)   | -1.9(-10.8,7.0)  | <0.0001             |
| HDL-C (mg/dL)                    | 41.0(35.0,48.0)   | 41.0(34.7,48.0)   | 0.0(-3.0,3.0)    | 0.025               |
| Triglycerides (mg/dL)            | 135.4(98.0,191.2) | 135.0(97.0,187.0) | -1.0(-28.0,24.0) | 0.0064              |

\* Wilcoxon signed-rank test. Data are from randomized subjects with enrollment and post run-in measures.

**Table S2. Effects of LD-MTX on biochemical measures (change from enrollment to 8 months post randomization). All data are reported as median (Interquartile Range).**

| Biochemical Measure           | LD-MTX            |                   |                   | Placebo           |                   |                   | P-value for change* |
|-------------------------------|-------------------|-------------------|-------------------|-------------------|-------------------|-------------------|---------------------|
|                               | Enrollment        | 8-Months          | Change            | Enrollment        | 8-Months          | Change            |                     |
| ALT (IU/L)                    | 22.0(16.0,28.0)   | 25.0(18.0,34.0)   | 3.0(-2.0,9.0)     | 21.0(16.0,28.0)   | 21.0(16.0,27.0)   | 0.0(-4.0,4.0)     | <0.0001             |
| AST (IU/L)                    | 20.0(17.0,25.0)   | 22.0(18.0,28.0)   | 2.0(-2.0,6.0)     | 21.0(17.0,25.0)   | 20.0(17.0,25.0)   | 0.0(-3.0,3.0)     | <0.0001             |
| Corpuscular Hemoglobin        | 30.0(28.9,31.0)   | 31.0(29.9,32.1)   | 1.0(0.4,1.7)      | 30.0(28.8,31.2)   | 30.0(29.0,31.2)   | 0.0(-0.6,0.6)     | <0.0001             |
| Corpuscular Volume (fl)       | 90.0(87.0,93.0)   | 94.0(90.0,97.0)   | 3.0(1.0,5.0)      | 90.0(87.0,93.0)   | 91.0(87.0,94.0)   | 0.0(-1.0,2.0)     | <0.0001             |
| WBC (x10E3/uL)                | 7.0(5.9,8.4)      | 6.7(5.5,7.9)      | -0.4(-1.3,0.4)    | 7.0(5.9,8.3)      | 6.8(5.6,8.0)      | -0.2(-1.0,0.6)    | <0.0001             |
| Hematocrit (%)                | 42.5(39.7,45.0)   | 41.8(38.5,44.1)   | -1.0(-2.6,0.8)    | 42.2(39.7,44.8)   | 42.3(39.8,44.9)   | 0.0(-1.7,1.5)     | <0.0001             |
| Hemoglobin (g/dL)             | 14.1(13.1,15.0)   | 13.8(12.7,14.8)   | -0.3(-0.9,0.2)    | 14.0(13.1,15.0)   | 14.1(13.0,15.0)   | 0.0(-0.6,0.5)     | <0.0001             |
| Interleukin-1 $\beta$ (pg/mL) | 1.51(0.40,3.16)   | 1.00(0.21,2.49)   | -0.24(-1.74,0.69) | 1.39(0.47,3.06)   | 0.80(0.16,2.09)   | -0.31(-1.79,0.58) | 0.62                |
| Interleukin-6 (pg/mL)         | 2.24(1.48,3.55)   | 2.68(1.78,4.12)   | 0.30(-0.32,1.22)  | 2.18(1.51,3.35)   | 2.29(1.53,3.75)   | 0.04(-0.56,0.80)  | 0.001               |
| hsCRP (mg/L)                  | 1.45(0.73,3.40)   | 1.56(0.77,3.53)   | 0.09(-0.54,0.71)  | 1.43(0.67,3.07)   | 1.47(0.75,3.31)   | 0.05(-0.54,0.71)  | 0.83                |
| LDL-C (mg/dL)                 | 69.0(54.8,87.0)   | 67.0(51.7,85.0)   | -2.0(-13.0,9.0)   | 68.0(54.0,86.0)   | 69.0(53.7,86.0)   | 0.4(-9.0,11.0)    | <0.0001             |
| HDL-C (mg/dL)                 | 41.0(35.0,48.6)   | 40.0(34.0,48.0)   | 0.0(-4.0,3.0)     | 41.0(35.0,48.0)   | 41.0(35.0,48.3)   | 0.0(-3.5,4.0)     | 0.0028              |
| Triglycerides (mg/dL)         | 135.0(97.0,187.0) | 132.4(94.0,182.0) | -2.0(-31.9,27.0)  | 135.0(99.0,190.0) | 139.0(98.0,193.0) | 2.0(-27.0,32.0)   | 0.0051              |

\* Wilcoxon ranked sum test comparing the LD-MTX change with the Placebo change. Data are from subjects with 8 Month assessments.
